# Supplementary material
Source: publisher figshare collection journal article supplement (https://tandf.figshare.com/ndownloader/files/24977857)
Supplement: Supplementary file 1 [file 24977857]

## Sheet: 1,5-fold up
Table S2. Proteins with significantly increased levels in IVM-CDM versus CDM, in both BHN100 and BHN418
Selection criteria: >1.5 fold upregulated in IVM-CDM versus CDM and a q-value < 0.05, in both BHN100 and BHN418.
CDM: chemically defined medium; IVM-CDM: in vivo-mimicking CDM
Protein FDR HIGH	false discovery rate on protein level <1%
na	not available (or only available in one condition per strain)
	p-value or q-value <0.05 = significant
q-value	Benjamini-Hochberg corrected
	ratio >1.5 between two conditions; increased level
	ratio <0.67 between two conditions; decreased level
ON	protein detected in at least 2 replicates of in one growth condition of one strain and not detected in the other growth condition of the same strain
OFF	protein not detected in one growth condition of one strain and detected in at least 2 replicates in the other growth condition of the same strain
Protein properties							Identification overview							Median normalized protein intensities												Quantitative comparative analysis
Accession	Gene	GI number	Description	Number of amino acids	MW [kDa]	Calc. pI	Sequence coverage [%]	Number of peptide spectrum matches	Number of Unique Peptides	Protein FDR Confidence Combined	Exp q-value Combined	Sum PEP Score	Score Sequest HT Sequest HT	BHN100 CDM1	BHN100 CDM2	BHN100 CDM3	BHN100 IVMCDM1	BHN100 IVMCDM2	BHN100 IVMCDM3	BHN418 CDM1	BHN418 CDM2	BHN418 CDM3	BHN418 IVMCDM1	BHN418 IVMCDM2	BHN418 IVMCDM3	Average BHN100CDMIVM / BHN100CDM	P-value BHN100CDMIVM / BHN100CDM	Q-Value BHN100CDMIVM / BHN100CDM	Average BHN418CDMIVM / BHN418CDM	P-value BHN418CDMIVM / BHN418CDM	Q-Value BHN418CDMIVM / BHN418CDM	Annova p-value	Annova q-value
sp_0268	spuA	15900202	alkaline amylopullulanase	1280	142.5	5.69	32	121	29	High	0	133.906	302.46	11576256	8569891	10193183	14665535	16813752	17598640	13675807	15255263	15994509	23730484	24825714	25091058	1.61763	0.00919189	0.0357258	1.63932	0.000553854	0.00596028	3.25743e-05	0.000137638
sp_2010	pbp2A	15901833	penicillin-binding protein 2A	731	80.8	6.29	39	159	26	High	0	119.57	444.25	14484848	16954770	14092414	23297462	22896438	22729870	17746924	18303842	17375652	30140422	29453714	30498180	1.51374	0.00197568	0.0129418	1.68629	8.84699e-06	0.000844447	1.23419e-06	1.16616e-05
sp_0674	SP_0674	15900575	ribonuclease Z (EC:3.1.26.11)	309	34.1	6.76	50	111	14	High	0	72.009	283.91	23512758	21802472	23857476	35975820	36688012	35535196	23814034	23490798	22899404	32195794	36209588	37577864	1.56419	0.000108456	0.00305571	1.50964	0.00103118	0.00824304	2.95864e-06	2.27587e-05
sp_0047	SP_0047	15899992	phosphoribosylaminoimidazole synthetase (EC:6.3.3.1)	340	36.5	4.82	49	185	16	High	0	91.917	634.8	39612844	32143554	40417620	63958276	57890028	69646352	43744360	42907064	47154636	71897576	74398128	75884104	1.70712	0.0040626	0.0206855	1.66046	0.000101968	0.0027816	2.76021e-05	0.000120885
sp_0046	SP_0046	15899991	amidophosphoribosyltransferase (EC:2.4.2.14)	480	52.8	5.71	35	129	16	High	0	84.96	401.3	31903796	33808660	31703118	53093328	51802612	50597908	47215664	39529512	47056004	66313124	66967976	72819144	1.59619	4.60334e-05	0.00213254	1.54035	0.00271908	0.0143026	2.75974e-06	2.15045e-05
sp_1069	SP_1069	15900938	hypothetical protein	334	35.1	6.04	70	230	19	High	0	142.813	897.21	58067444	54541340	57221192	103076072	79402584	98672128	69462456	64509436	65782588	113881136	110955744	112628208	1.65548	0.00385895	0.0200403	1.6894	2.33299e-05	0.00141819	1.30758e-05	6.87602e-05
sp_0369	ponA,pbp1A	15900292	penicillin-binding protein 1A	719	79.7	5.6	51	369	36	High	0	233.792	1276.2	104064704	126550656	105573704	174162016	172496832	165857872	96818656	96489040	93076416	172510096	174358320	177473328	1.52449	0.00276721	0.0159731	1.8309	2.30817e-06	0.000492095	2.18164e-06	1.80549e-05
sp_0770	SP_0770	15900664	ABC transporter ATP-binding protein	513	58.4	5.27	53	257	24	High	0	162.666	883.61	87239928	87579864	90667536	149052368	156249984	155880896	61540796	62429608	61840516	115973232	125061360	119118504	1.73712	9.50776e-06	0.00137127	1.93828	7.95147e-06	0.000844447	5.33329e-10	4.92303e-08
sp_1276	SP_1276	15901136	carbamoyl phosphate synthase small subunit (EC:6.3.5.5)	359	39.8	6.42	34	81	9	High	0	59.072	257.94	17961144	14337003	20314004	39202064	34051028	42841676	26592338	24566144	25266410	45208096	43223436	44652432	2.20662	0.00283186	0.0162658	1.74137	3.20414e-05	0.00163411	2.13435e-05	9.86033e-05
sp_1275	carB	15901135	carbamoyl phosphate synthase large subunit (EC:6.3.5.5)	1058	116	4.89	44	298	40	High	0	213.326	937.02	57147608	55028684	56251052	110789216	92190752	100490448	58724760	57741232	62136172	120814216	112719264	130240800	1.80179	0.00041498	0.00543671	2.03679	0.000114209	0.00291233	6.87806e-07	7.64229e-06
sp_0149	metQ	15900087	D-Methionin-Transportsystem Substrat-bindendes Protein	284	31.2	5.63	76	260	23	High	0	150.668	824.59	69861408	77642840	68111432	129097280	114624016	117756232	79283584	92386112	85490272	135745888	122417344	131167280	1.67649	0.000659606	0.00692884	1.51396	0.00148876	0.00988252	1.15002e-05	6.21172e-05
sp_1802	SP_1802	15901631	hypothetical_protein	188	21.8	9.72	39	73	10	High	0	46.418	168.79	51906288	46289860	50001572	79709352	81838592	75109648	12143901	12295400	13133286	17981762	24647600	25650608	1.5969	0.000374198	0.00525747	1.81728	0.0070006	0.0272814	1.15196e-07	2.06321e-06
sp_1662	SP_1662	15901497	hypothetical protein	261	30.4	8.68	12	8	3	High	0	11.957	19.98	649335	511872	772520	1.23057e+06	1.5165e+06	1.48291e+06	338678	521824	435625	1.29785e+06	1.29706e+06	1155883	2.18748	0.00437209	0.021693	2.89384	0.00119959	0.0088809	5.53908e-05	0.000216511
sp_0801	SP_0801	15900694	hypothetical protein	309	35.5	5.21	42	99	10	High	0	56.202	299.11	14992687	19429418	17631210	31531940	35268048	32153474	15249720	17054058	15007955	21172856	25092904	26862786	1.901	0.00147087	0.0108547	1.54567	0.00604765	0.0248908	6.9015e-05	0.000255255
sp_1227	rr2	15901089	DNA-binding response regulator	234	26.8	5.08	79	111	13	High	0	80.791	359.15	17165684	14909264	16665778	29086230	30501460	34347216	21436758	20848858	22998024	46241196	48190664	43814732	1.92724	0.000559327	0.00652175	2.11763	4.82389e-05	0.00209571	3.11339e-07	4.34426e-06
sp_1178	SP_1178	15901043	NrdH-redoxin	72	8.2	6.54	69	30	4	High	0	19.455	82.98	7193761	8793232	6.87711e+06	12280546	14077042	12459934	6.41383e+06	7526443	7438865	13527736	9648205	14074956	1.69775	0.0036025	0.0190069	1.74239	0.0140041	0.0422284	0.000980649	0.00227177
sp_0749	SP_0749	15900644	branched-chain amino acid ABC transporter substrate-binding protein	386	40.4	5.4	80	450	26	High	0	226.655	1883.74	222815408	246499008	221268304	466178656	421385472	442580512	136375408	133677872	131100760	374932128	348050432	365077120	1.92612	0.000134324	0.0031292	2.71232	2.19742e-06	0.000492095	3.72934e-09	2.03419e-07
sp_2126	SP_2126	15901940	dihydroxy-acid dehydratase (EC:4.2.1.9)	567	59.8	5.26	53	466	27	High	0	222.245	1792.33	200015888	190839072	196349488	393018336	341114240	374865472	245565440	223513232	243357520	430813920	417174208	405679360	1.88861	0.000132382	0.0031292	1.75969	8.22814e-05	0.00260854	1.56186e-07	2.49897e-06
sp_0366	SP_0366	15900290	oligopeptide ABC transporter oligopeptide-binding protein AliA	660	73	5.16	74	1177	62	High	0	558.562	4204.82	668202752	820467840	683044224	1418896896	1199118720	1245223424	911562432	712519168	838637824	1903506560	1666109440	1804921344	1.77889	0.00220672	0.0138335	2.18236	0.000669839	0.00644034	1.39392e-05	7.11787e-05
sp_1901	SP_1901	15901728	RNA methyltransferase	451	51.7	8.92	20	22	5	High	0	27.59	62.32	1.51738e+06	1.05552e+06	1.27954e+06	2.30613e+06	2518382	2465361	813826	1.05934e+06	814426	2.8196e+06	3602519	3.29322e+06	1.89227	0.0039015	0.0200403	3.61489	0.000340923	0.00470474	9.90989e-06	5.55695e-05
sp_2216	pcsB	15902020	peptidoglycan hydrolase	392	41.7	6.07	47	142	13	High	0	92.537	473.81	29828166	31905898	30412844	50926240	60933996	47678732	20777034	22413744	25266410	31553342	35854132	39067660	1.73135	0.00201625	0.0130608	1.55535	0.00635109	0.0251683	4.34297e-05	0.000176067
sp_0048	purN	15899993	phosphoribosylglycinamide formyltransferase (EC:2.1.2.2)	181	20.2	4.89	14	6	2	High	0.002	8.624	20.42	1.05455e+06	1.11219e+06	1088499	2.37814e+06	2.1945e+06	2298689	1.21657e+06	1.6945e+06	1.32554e+06	4.16584e+06	3656620	4.08246e+06	2.11085	1.16704e-05	0.00137127	2.81001	0.000628941	0.00619957	8.63381e-07	8.93153e-06
sp_1804	gls24	15901633	general stress protein 24	202	21.8	4.69	94	1007	28	High	0	314.226	3608.18	1259678720	1718408832	1533646336	2871437568	2328293632	2320917504	564480448	382201664	498262560	824270912	747922432	723603904	1.66691	0.0110246	0.0399215	1.58885	0.0174521	0.0493286	3.164e-06	2.373e-05
sp_1472	SP_1472	15901322	oxidoreductase	414	45.8	5.2	39	126	15	High	0	94.236	411.86	22721312	24821080	22031752	61315460	57179744	59898080	20777034	20416480	26844388	49988672	46062168	45955128	2.56407	2.16365e-05	0.00179235	2.08716	0.0013134	0.00933709	1.3265e-06	1.21512e-05
sp_0987	SP_0987	15900862	hypothetical protein	266	30	6.65	24	31	4	High	0	19.801	97.45	216329	197518	251106	687674	923704	811935	2.00371e+06	3.06364e+06	2.45208e+06	4378352	4.13424e+06	4720939	3.64434	0.000305998	0.00488759	1.75991	0.0107863	0.0352682	3.37391e-08	8.99708e-07
sp_1471	SP_1471	15901321	oxidoreductase	201	22.6	5.3	62	118	13	High	0	57.359	315.33	15572694	13241285	14842755	44901048	45715680	42567804	16300471	17869480	15205264	41723836	42868404	47257620	3.05072	2.91693e-05	0.00179235	2.67037	8.19971e-05	0.00260854	4.10427e-08	1.01521e-06
sp_0980	SP_0980	15900857	O-methyltransferase	225	25.5	5.17	35	36	8	High	0	29.332	88.91	3.40746e+06	2.08873e+06	3.55697e+06	10860601	9121732	9519023	4.60493e+06	4.1087e+06	5.01016e+06	17089578	17248112	17531910	3.25868	0.00251081	0.0149684	3.77954	2.11872e-05	0.0013807	4.2441e-06	3.0315e-05
sp_1002	SP_1002	15900875	adhesion lipoprotein	305	33.9	5.36	47	74	12	High	0	71.507	218.8	4959315	4366835	5.10386e+06	14545297	13468928	14479744	12641165	14927445	14909296	35796940	36920204	33572952	2.94483	3.66759e-05	0.00185931	2.50224	0.000119657	0.00298632	4.92389e-09	2.08339e-07
sp_1157	SP_1157	15901022	voltage-gated chloride channel family protein	516	56.4	6.96	8	5	4	High	0	14.475	12.22	1.21424e+06	362591	876384	4.32347e+06	3.79393e+06	3649148	851471	752232	841122	3.60405e+06	3.47628e+06	3791272	4.79638	0.00994603	0.0372822	4.44678	5.73898e-06	0.000708282	0.000205606	0.000597402
sp_1429	SP_1429	15901282	U32 family peptidase	428	47.9	5.34	57	109	20	High	0	108.274	353.09	10482213	10859802	10546457	58209472	60629612	62905192	1.30624e+06	2.40289e+06	2.05686e+06	36955648	33721576	34783956	5.69937	2.52314e-07	0.000150022	18.2902	9.16135e-05	0.00271901	2.13071e-08	6.72854e-07
sp_1805	SP_1805	15901634	hypothetical_protein	67	7	4.88	70	178	8	High	0	71.184	543.53	64922692	71955856	63473964	198080016	212103392	231095488	44144680	44065988	34831500	98074192	95072208	91108312	3.20075	3.90323e-05	0.00189632	2.31022	0.000494032	0.00573762	8.656e-08	1.70417e-06
sp_2026	adh	15901847	bifunctional acetaldehyde-CoA/alcohol dehydrogenase	883	97.2	6.61	43	447	41	High	0	259.999	1439.67	57501392	65552660	64336564	358980512	308604192	325170176	111018624	114880536	122236024	372275680	353302912	417673792	5.29778	1.0207e-05	0.00137127	3.28393	3.11624e-05	0.00163411	3.41223e-09	2.03419e-07
sp_1185	lacE-2	15901050	PTS system lactose-specific transporter subunit IIBC	563	61	6.83	3	6	2	High	0.002	7.841	12.97	19358	na	25508.1	na	136233	178113	523728	597124	577078	852623	933661	1.28799e+06	7.00631	0.0096145	0.0369984	1.8106	0.011559	0.0370457	1.49409e-06	1.32808e-05
sp_0963	SP_0963	15900840	dihydroorotate dehydrogenase electron transfer subunit (EC:1.3.5.2)	266	28.9	5.15	8	3	2	High	0.003	6.694	8.01	31751.3	32345.2	na	367836	445433	465232	na	96884.8	65934.5	447058	549252	651390	13.2977	0.000103845	0.00305571	6.74654	0.00244167	0.0135098	5.15372e-06	3.45501e-05
sp_1572	SP_1572	15901415	non-heme iron-containing ferritin	172	19.2	4.67	80	412	15	High	0	140.055	1292.94	29040278	36194128	37619476	623112064	609404160	761598848	97629080	81585592	93667536	1659081472	1475355520	1419476480	19.3878	1.02113e-05	0.00137127	16.6882	2.51711e-06	0.000492095	4.21707e-10	4.21707e-08
sp_1648	psaB	15901484	manganese ABC transporter ATP-binding protein	240	26.8	7.56	67	139	17	High	0	104.797	449.32	4.44071e+06	3.87096e+06	4623551	106695192	97164440	97762840	4102842	5507045	4644804	102773664	88891096	95005632	23.3179	8.78602e-07	0.000341483	20.1106	5.95691e-06	0.000708282	1.30748e-10	2.33303e-08
sp_0641	prtA	15900547	serine protease	2140	240.3	6.34	57	541	114	High	0	623.061	1567.51	33976936	52351060	36328336	432001888	415286784	423626080	21436758	33859848	22208976	210702384	205999264	233902960	10.3616	6.28915e-05	0.00244438	8.39429	0.000145265	0.00321502	1.25061e-07	2.20696e-06
sp_1650	psaA	15901485	manganese ABC transporter manganese-binding adhesion liprotein	309	34.6	5.53	76	262	26	High	0	222.421	958.68	12959334	13081850	13342142	559231936	467114240	508438880	10876174	12680365	9304392	388227712	327910016	316142368	38.9704	2.57327e-07	0.000150022	31.4136	6.03821e-06	0.000708282	7.03143e-11	2.10943e-08
